# Supplementary material for: Association of changes in red meat consumption with total and cause specific mortality among US women and men: two prospective cohort studies
Source: PubMed Central journal article supplement — BMJ. 2019 Jun 12;365:l2110. doi: 10.1136/bmj.l2110 (PMC6559336; doi:10.1136/bmj.l2110), 2019-06-12
Supplement: zhey047253.ww1.pdf [file zhey047253.ww1.pdf]

## **Supplement Figure and Tables**

**Supplementary Figure 1.** 8-Year HRs and 95% CIs for All-Cause and Cause-Specific Mortality per Increase in One Serving/day of Total Red Meat and Subtypes of Red Meat Consumption in 8 Years.

**Supplementary Table 1.** Categories for causes of death.

**Supplementary Table 2.** Overall 8-Year HRs and 95% CIs for Mortality Risk According to Updated 8-Year Change in Total Red Meat Intake in NHS (1986-2010) and HPFS (1986-2010).

**Supplementary Table 3.** Overall 4-Year HRs and 95% CIs for Mortality Risk According to Updated 4-Year Change in Total Red Meat Intake in NHS (1986-2010) and HPFS (1986-2010).

**Supplementary Table 4.** Overall 12-Year HRs and 95% CIs for Mortality Risk According to Updated 12-Year Change in Total Red Meat Intake in NHS (1986-2010) and HPFS (1986-2010).

**Supplementary Table 5.** HRs and 95% CIs for 8-year all-cause mortality associated with one serving/day increased consumption of food groups during an 8-year course in the individual cohorts of NHS, HPFS and pooled findings

**Supplementary Table 6.** HRs and 95% CIs for 4-year all-cause mortality associated with one serving/day decreased intake of red meat and concomitant increased intake of another major dietary protein source, whole grain, or vegetables during a 4-year course in the individual cohorts of NHS, HPFS and pooled findings.

**Supplementary Table 7.** HRs and 95% CIs for 12-year all-cause mortality associated with one serving/day decreased intake of red meat and concomitant increased intake of another major dietary protein source, whole grain, or vegetables during a 12-year course in the individual cohorts of NHS, HPFS and pooled findings.

**Supplemental Figure 1. 8-Year HRs and 95% CIs for All-Cause and Cause-Specific Mortality per Increase in One Serving/day of Total Red Meat and Subtypes of Red Meat Consumption in 8 Years.**

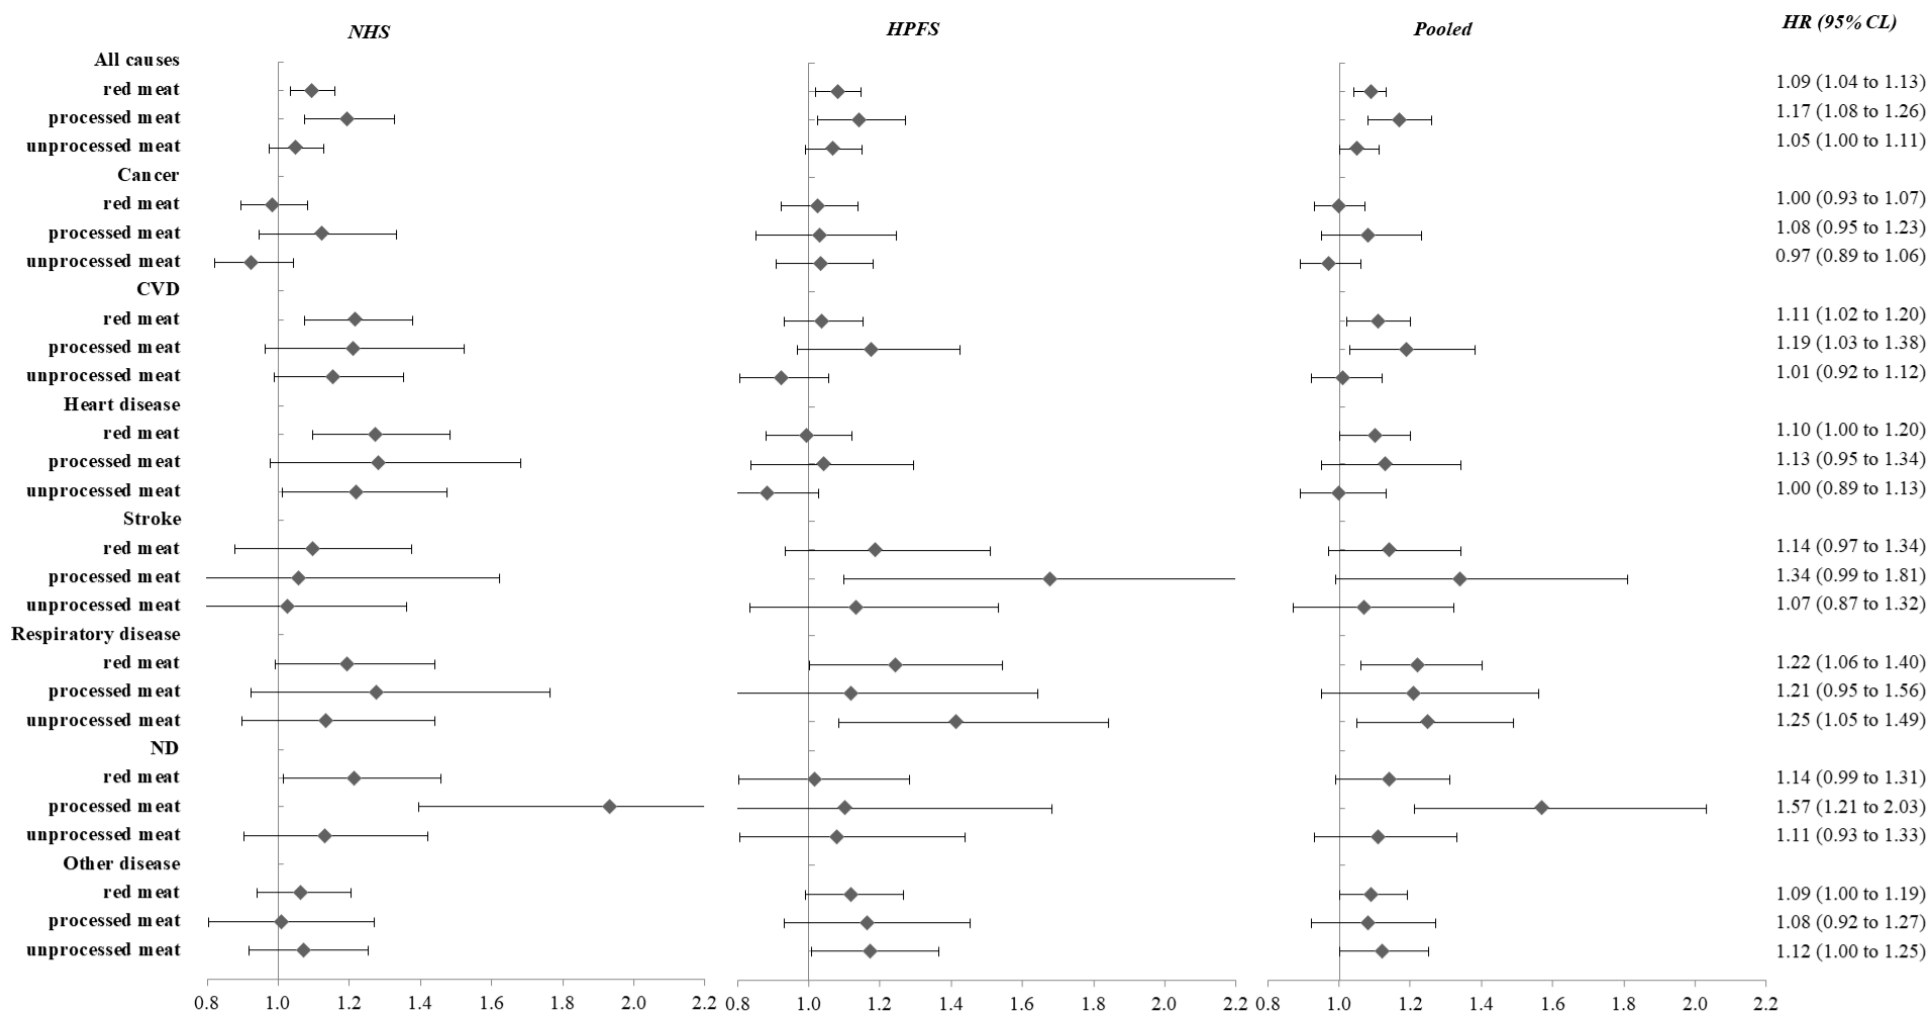

CI, confidence interval; CVD, cardiovascular disease; HPFS, Health Professionals Follow-up Study; HR, hazard ratio; ND, neurodegenerative disease; NHS, Nurses' Health Study.

**Supplementary Table 1. Categories for causes of death**

| Causes of death           | ICD-8 code                 | ICD-9 code             |
|---------------------------|----------------------------|------------------------|
| Cancer                    | 140-207                    | 140-208                |
| Cardiovascular disease    | 390-458                    | 390-459                |
| Heart disease             | 390-429 and 440-458        | 390-429 and 440-459    |
| Stroke                    | 430-438                    | 430-438                |
| Respiratory disease       | 460-519                    | 460-519                |
| Neurodegenerative disease | 290, 340, 342, and 348     | 290, 332, 335, and 340 |
| All other cause           | The rest of the ICD codes. |                        |

**Supplementary Table 2. Overall 8-Year HRs and 95% CIs for Mortality Risk According to Updated 8-Year Change in Total Red Meat Intake in NHS (1986-2010) and HPFS (1986-2010)**

|                         | Changes in frequency of red meat consumption (categories in servings per day) |                   |                       |                   |                   | p for trend |
|-------------------------|-------------------------------------------------------------------------------|-------------------|-----------------------|-------------------|-------------------|-------------|
|                         | decrease                                                                      |                   | no change (reference) | increase          |                   |             |
|                         | >0.5                                                                          | 0.15-0.5          |                       | 0.15-0.5          | >0.5              |             |
| <b>NHS (N=53,560)</b>   |                                                                               |                   |                       |                   |                   |             |
| <b>red meat</b>         |                                                                               |                   |                       |                   |                   |             |
| model 3                 | 0.96 (0.89,1.04)                                                              | 0.98 (0.92,1.04)  | 1                     | 1.06 (0.99,1.13)  | 1.10 (1.01,1.19)  | 0.003       |
| <b>processed meat</b>   |                                                                               |                   |                       |                   |                   |             |
| model 3                 | 1.00 (0.88,1.14)                                                              | 0.97 (0.89,1.05)  | 1                     | 1.09 (1.02,1.17)  | 1.21 (1.07,1.37)  | 0.002       |
| <b>unprocessed meat</b> |                                                                               |                   |                       |                   |                   |             |
| model 3                 | 0.99 (0.91,1.08)                                                              | 1.01 (0.95,1.07)  | 1                     | 1.06 (0.99,1.13)  | 1.05 (0.95,1.16)  | 0.22        |
| <b>HPFS (N=27,423)</b>  |                                                                               |                   |                       |                   |                   |             |
| <b>red meat</b>         |                                                                               |                   |                       |                   |                   |             |
| model 3                 | 0.96 (0.87,1.06)                                                              | 1.01 (0.92,1.10)  | 1                     | 1.04 (0.95,1.13)  | 1.09 (0.99,1.19)  | 0.02        |
| <b>processed meat</b>   |                                                                               |                   |                       |                   |                   |             |
| model 3                 | 0.94 (0.82,1.08)                                                              | 1.01 (0.92,1.11)  | 1                     | 1.13 (1.05,1.23)  | 1.02 (0.91,1.15)  | 0.05        |
| <b>unprocessed meat</b> |                                                                               |                   |                       |                   |                   |             |
| model 3                 | 0.99 (0.89,1.10)                                                              | 1.06 (0.97,1.15)  | 1                     | 1.01 (0.93,1.10)  | 1.13 (1.03,1.24)  | 0.08        |
| <b>Pooled-results</b>   |                                                                               |                   |                       |                   |                   |             |
| <b>red meat</b>         |                                                                               |                   |                       |                   |                   |             |
| model 3                 | 0.96 (0.91, 1.02)                                                             | 0.99 (0.94, 1.04) | 1                     | 1.05 (0.99, 1.11) | 1.09 (1.03, 1.16) | 0.0002      |
| <b>processed meat</b>   |                                                                               |                   |                       |                   |                   |             |
| model 3                 | 0.97 (0.88, 1.07)                                                             | 0.98 (0.93, 1.05) | 1                     | 1.11 (1.05, 1.17) | 1.10 (1.01, 1.20) | 0.0003      |
| <b>unprocessed meat</b> |                                                                               |                   |                       |                   |                   |             |
| model 3                 | 0.99 (0.93, 1.06)                                                             | 1.03 (0.98, 1.08) | 1                     | 1.04 (0.98, 1.09) | 1.09 (1.02, 1.17) | 0.04        |

CI: confidence interval; HPFS: Health Professionals Follow-up Study; HR: hazard ratio; NHS: Nurses' Health Study.

Model 3: adjusted for all covariates in the full model (i.e., age (months), race (white/nonwhite), initial consumption of red meat (in quintile), initial BMI (<23, 23–24.9, 25–29.9, 30–34.9, and ≥35 kg/m<sup>2</sup>), family history of MI, diabetes or cancer, updated aspirin use, multivitamin use, menopause and HT status (only for women), and simultaneous changes in other lifestyle factors: smoking status (never to never, never to current, pasta to past, past to current, current to past, current to current or missing indicator) and initial and changes (all in quintiles) in physical activity, alcohol drink, and total energy intake, and other food groups, i.e., vegetables, fruits, whole grains, and sugar sweetened beverage), and weight change (quintiles) and initial status of hypertension, diabetes, and hypercholesterolemia.

**Supplementary Table 3. Overall 4-Year HRs and 95% CIs for Mortality Risk According to Updated 4-Year Change in Total Red Meat Intake in NHS (1986-2010) and HPFS (1986-2010)**

|                        | Changes in frequency of red meat consumption (categories in servings per day) |                   |                       |                   |                   | p for trend |
|------------------------|-------------------------------------------------------------------------------|-------------------|-----------------------|-------------------|-------------------|-------------|
|                        | decrease                                                                      |                   | no change (reference) | increase          |                   |             |
|                        | >0.5                                                                          | 0.15-0.5          | ± 0.14                | 0.15-0.5          | >0.5              |             |
| <b>NHS (N=52,415)</b>  |                                                                               |                   |                       |                   |                   |             |
| <b>red meat</b>        |                                                                               |                   |                       |                   |                   |             |
| cases/person-years     | 1107/164155                                                                   | 1593/222120       | 4404/347366           | 1158/162329       | 732/87366         |             |
| model 2                | 0.98(0.90,1.07)                                                               | 0.99(0.92,1.05)   | 1                     | 1.00(0.93,1.07)   | 1.16(1.07,1.27)   | 0.005       |
| processed meat         |                                                                               |                   |                       |                   |                   |             |
| cases/person-years     | 247/29774                                                                     | 858/122885        | 6976/730624           | 735/82309         | 178/17744         |             |
| model 2                | 1.16(1.00,1.33)                                                               | 0.99(0.91,1.08)   | 1                     | 1.18(1.09,1.28)   | 1.24(1.06,1.44)   | 0.02        |
| unprocessed meat       |                                                                               |                   |                       |                   |                   |             |
| cases/person-years     | 756/114080                                                                    | 1584/218785       | 5028/426308           | 1123/158876       | 503/65288         |             |
| model 2                | 1.02(0.92,1.12)                                                               | 1.01(0.95,1.08)   | 1                     | 1.03(0.96,1.10)   | 1.14(1.04,1.26)   | 0.09        |
| <b>HPFS (N=30,915)</b> |                                                                               |                   |                       |                   |                   |             |
| <b>red meat</b>        |                                                                               |                   |                       |                   |                   |             |
| cases/person-years     | 1008/89119                                                                    | 930/97660         | 3659/202384           | 926/93985         | 958/74337         |             |
| model 2                | 1.09(0.99,1.19)                                                               | 1.01(0.92,1.10)   | 1                     | 1.04(0.96,1.14)   | 1.24(1.14,1.35)   | 0.005       |
| processed meat         |                                                                               |                   |                       |                   |                   |             |
| cases/person-years     | 311/24807                                                                     | 759/68589         | 5262/379667           | 810/62926         | 339/21497         |             |
| model 2                | 1.17(1.02,1.34)                                                               | 1.11(1.01,1.21)   | 1                     | 1.17(1.08,1.27)   | 1.23(1.10,1.39)   | 0.09        |
| unprocessed meat       |                                                                               |                   |                       |                   |                   |             |
| cases/person-years     | 753/64168                                                                     | 933/100394        | 4196/245146           | 963/94419         | 636/53360         |             |
| model 2                | 1.06(0.96,1.17)                                                               | 0.92(0.84,1.00)   | 1                     | 1.08(1.00,1.17)   | 1.15(1.04,1.26)   | 0.01        |
| <b>Pooled-results</b>  |                                                                               |                   |                       |                   |                   |             |
| <b>red meat</b>        |                                                                               |                   |                       |                   |                   |             |
| model 2                | 1.03 (0.97, 1.09)                                                             | 0.99 (0.94, 1.05) | 1                     | 1.02 (0.96, 1.08) | 1.20 (1.13, 1.27) | <.0001      |
| processed meat         |                                                                               |                   |                       |                   |                   |             |
| model 2                | 1.16 (1.06, 1.28)                                                             | 1.04 (0.98, 1.11) | 1                     | 1.18 (1.11, 1.24) | 1.23 (1.13, 1.35) | 0.004       |
| unprocessed meat       |                                                                               |                   |                       |                   |                   |             |
| model 2                | 1.04 (0.97, 1.11)                                                             | 0.97 (0.92, 1.02) | 1                     | 1.05 (1.00, 1.11) | 1.14 (1.07, 1.22) | 0.003       |

The exposure was change in red meat intake in 4-year period and the outcome was mortality in the subsequent 4 years.

CI: confidence interval; HPFS: Health Professionals Follow-up Study; HR: hazard ratio; NHS: Nurses' Health Study.

Model 2: Model 1+ race (white/nonwhite), initial consumption of red meat (in quintile), initial BMI (<23, 23–24.9, 25–29.9, 30–34.9, and  $\geq 35$  kg/m<sup>2</sup>), family history of MI, diabetes or cancer, updated aspirin use, multivitamin use, menopause and HT status (only for women), and simultaneous changes in other lifestyle factors: smoking status (never to never, never to current, pasta to past, past to current, current to past, current to current or missing indicator) and initial and changes (all in quintiles) in physical activity, alcohol drink, and total energy intake, and other food groups, i.e., vegetables, fruits, whole grains, and sugar sweetened beverage.

**Supplementary Table 4. Overall 12-Year HRs and 95% CIs for Mortality Risk According to Updated 12-Year Change in Total Red Meat Intake in NHS (1986-2010) and HPFS (1986-2010)**

|                         | Changes in frequency of red meat consumption (categories in servings per day) |                   |                       |                   |                   | p for trend |
|-------------------------|-------------------------------------------------------------------------------|-------------------|-----------------------|-------------------|-------------------|-------------|
|                         | decrease                                                                      |                   | no change (reference) | increase          |                   |             |
|                         | >0.5                                                                          | 0.15-0.5          | ± 0.14                | 0.15-0.5          | >0.5              |             |
| <b>NHS (N=46,264)</b>   |                                                                               |                   |                       |                   |                   |             |
| <b>red meat</b>         |                                                                               |                   |                       |                   |                   |             |
| cases/person-years      | 2081/184753                                                                   | 1386/133032       | 1226/114973           | 578/61682         | 317/31370         |             |
| model 2                 | 0.97(0.88,1.06)                                                               | 0.96(0.89,1.04)   | 1                     | 0.94(0.85,1.04)   | 1.05(0.92,1.19)   | 0.54        |
| <b>processed meat</b>   |                                                                               |                   |                       |                   |                   |             |
| cases/person-years      | 511/43886                                                                     | 1366/131447       | 3356/319460           | 296/26245         | 59/4773           |             |
| model 2                 | 1.02(0.89,1.18)                                                               | 1.00(0.91,1.09)   | 1                     | 1.07(0.95,1.21)   | 1.22(0.94,1.58)   | 0.32        |
| <b>unprocessed meat</b> |                                                                               |                   |                       |                   |                   |             |
| cases/person-years      | 1410/123049                                                                   | 1475/136072       | 1657/157640           | 731/78698         | 315/30352         |             |
| model 2                 | 1.01(0.92,1.12)                                                               | 1.03(0.95,1.11)   | 1                     | 1.00(0.91,1.09)   | 1.12(0.99,1.26)   | 0.53        |
| <b>HPFS (N= 26,393)</b> |                                                                               |                   |                       |                   |                   |             |
| <b>red meat</b>         |                                                                               |                   |                       |                   |                   |             |
| cases/person-years      | 1222/85823                                                                    | 842/61164         | 902/64896             | 668/43623         | 680/36881         |             |
| model 2                 | 0.99(0.89,1.10)                                                               | 0.98(0.89,1.09)   | 1                     | 1.09(0.98,1.21)   | 1.19(1.06,1.32)   | 0.001       |
| <b>processed meat</b>   |                                                                               |                   |                       |                   |                   |             |
| cases/person-years      | 439/27994                                                                     | 818/61227         | 2235/163248           | 595/29564         | 227/10354         |             |
| model 2                 | 1.02(0.88,1.17)                                                               | 0.97(0.87,1.07)   | 1                     | 1.13(1.02,1.24)   | 1.16(1.00,1.34)   | 0.02        |
| <b>unprocessed meat</b> |                                                                               |                   |                       |                   |                   |             |
| cases/person-years      | 895/60395                                                                     | 895/63263         | 1252/87013            | 761/51638         | 511/30077         |             |
| model 2                 | 0.96(0.85,1.07)                                                               | 0.99(0.90,1.09)   | 1                     | 1.04(0.95,1.15)   | 1.08(0.96,1.21)   | 0.05        |
| <b>Pooled-results</b>   |                                                                               |                   |                       |                   |                   |             |
| <b>red meat</b>         |                                                                               |                   |                       |                   |                   |             |
| model 2                 | 0.98 (0.91, 1.05)                                                             | 0.97 (0.91, 1.03) | 1                     | 1.01 (0.94, 1.08) | 1.12 (1.03, 1.22) | 0.004       |
| <b>processed meat</b>   |                                                                               |                   |                       |                   |                   |             |
| model 2                 | 1.02 (0.92, 1.13)                                                             | 0.98 (0.92, 1.05) | 1                     | 1.10 (1.02, 1.19) | 1.17 (1.03, 1.33) | 0.01        |
| <b>unprocessed meat</b> |                                                                               |                   |                       |                   |                   |             |
| model 2                 | 0.99 (0.92, 1.06)                                                             | 1.01 (0.95, 1.07) | 1                     | 1.02 (0.96, 1.09) | 1.10 (1.01, 1.19) | 0.07        |

The exposure was change in red meat intake in 12-year period and the outcome was mortality in the subsequent 12 years.  
 CI: confidence interval; HPFS: Health Professionals Follow-up Study; HR: hazard ratio; NHS: Nurses' Health Study.

Model 2: Model 1+ race (white/nonwhite), initial consumption of red meat (in quintile), initial BMI (<23, 23–24.9, 25–29.9, 30–34.9, and  $\geq 35$  kg/m<sup>2</sup>), family history of MI, diabetes or cancer, updated aspirin use, multivitamin use, menopause and HT status (premenopausal, postmenopausal and hormone therapy never user, postmenopausal and hormone therapy current user, postmenopausal and hormone therapy past user, or missing indicator) (only for women), and simultaneous changes in other lifestyle factors: smoking status (never to never, never to current, pasta to past, past to current, current to past, current to current or missing indicator) and initial and changes (all in quintiles) in physical activity, alcohol drink, and total energy intake, and other food groups, i.e., vegetables, fruits, whole grains, and sugar sweetened beverage.



**Supplementary Table 5.** HRs and 95% CIs for 8-year all-cause mortality associated with one serving/day increased consumption of food groups during an 8-year course in the individual cohorts of NHS, HPFS and pooled findings

|                            | <b>Red meat*</b> | <b>Nuts</b>     | <b>Poultry without skin</b> | <b>Fish</b>     | <b>Dairy</b>    | <b>Eggs</b>     | <b>Legumes</b>  | <b>Whole grains**</b> | <b>Vegetables without legumes***</b> |
|----------------------------|------------------|-----------------|-----------------------------|-----------------|-----------------|-----------------|-----------------|-----------------------|--------------------------------------|
| <b>NHS</b>                 |                  |                 |                             |                 |                 |                 |                 |                       |                                      |
| Model 1 (Red Meat)         | 1.09(1.04,1.14)  | 0.86(0.82,0.90) | 0.90(0.80,1.01)             | 0.91(0.84,0.99) | 1.00(0.98,1.01) | 1.02(0.94,1.12) | 1.03(0.96,1.11) | 0.94(0.91,0.96)       | 0.96(0.94,0.97)                      |
| Model 2 (Processed Meat)   | 1.26(1.15,1.38)  | 0.86(0.82,0.90) | 0.91(0.81,1.03)             | 0.91(0.84,0.99) | 1.00(0.98,1.01) | 1.01(0.93,1.11) | 1.03(0.96,1.11) | 0.94(0.91,0.96)       | 0.96(0.95,0.98)                      |
| Model 3 (Unprocessed Meat) | 1.05(0.99,1.12)  | 0.86(0.81,0.90) | 0.89(0.79,1.00)             | 0.91(0.84,0.99) | 1.00(0.98,1.01) | 1.04(0.95,1.13) | 1.03(0.96,1.11) | 0.93(0.91,0.95)       | 0.96(0.94,0.98)                      |
| <b>HPFS</b>                |                  |                 |                             |                 |                 |                 |                 |                       |                                      |
| Model 1 (Red Meat)         | 1.07(1.03,1.12)  | 0.90(0.86,0.94) | 1.05(0.92,1.18)             | 0.89(0.8,0.98)  | 1.00(0.98,1.02) | 0.97(0.95,0.99) | 1.01(0.94,1.09) | 0.97(0.94,0.99)       | 0.99(0.97,1.00)                      |
| Model 2 (Processed Meat)   | 1.13(1.05,1.22)  | 0.90(0.86,0.94) | 1.05(0.93,1.19)             | 0.88(0.8,0.98)  | 1.00(0.98,1.02) | 0.97(0.95,0.99) | 1.01(0.94,1.10) | 0.97(0.94,0.99)       | 0.99(0.97,1.00)                      |
| Model 3 (Unprocessed Meat) | 1.07(1.01,1.14)  | 0.90(0.86,0.94) | 1.04(0.91,1.17)             | 0.88(0.8,0.97)  | 1.00(0.98,1.02) | 0.97(0.95,0.99) | 1.01(0.94,1.09) | 0.97(0.94,0.99)       | 0.99(0.97,1.00)                      |
| <b>Pooled</b>              |                  |                 |                             |                 |                 |                 |                 |                       |                                      |
| Model 1 (Red Meat)         | 1.08(1.05,1.12)  | 0.88(0.85,0.91) | 0.97(0.89,1.05)             | 0.90(0.85,0.96) | 1.00(0.99,1.01) | 0.97(0.95,0.99) | 1.02(0.97,1.08) | 0.95(0.93,0.97)       | 0.97(0.96,0.98)                      |
| Model 2 (Processed Meat)   | 1.18(1.11,1.25)  | 0.88(0.85,0.91) | 0.97(0.89,1.06)             | 0.90(0.85,0.96) | 1.00(0.99,1.01) | 0.97(0.95,0.99) | 1.02(0.97,1.08) | 0.95(0.93,0.97)       | 0.97(0.96,0.98)                      |
| Model 3 (Unprocessed Meat) | 1.06(1.02,1.11)  | 0.88(0.85,0.91) | 0.96(0.88,1.04)             | 0.90(0.84,0.96) | 1.00(0.99,1.01) | 0.98(0.96,1.00) | 1.02(0.97,1.08) | 0.95(0.93,0.96)       | 0.97(0.96,0.98)                      |

CI: confidence interval; HPFS: Health Professionals Follow-up Study; HR: hazard ratio; NHS: Nurses' Health Study.

Model: Cox proportional hazards models including all food groups (red meat, nuts, poultry without skin, fish, dairy, eggs, legumes, whole grains, and vegetables excluding legumes) simultaneously (initial and change, both continuous, per serving), adjusted for age, race (white, nonwhite), BMI groups in 1986 ( $\text{kg}/\text{m}^2$ , <21, 21-22, 23-24, 25-29, 30+), family history of MI, diabetes and cancer, updated aspirin use, women menopausal status and use of postmenopausal hormones ((premenopausal, postmenopausal and hormone therapy never user, postmenopausal and hormone therapy current user, postmenopausal and hormone therapy past user, or missing indicator)) (only for women), and simultaneous changes in other lifestyle factors: smoking status (never to never, never to current, pasta to past, past to current, current to past, current to current or missing indicator) and initial and changes (all in quintiles) in physical activity, alcohol drink, total energy intake, and other food groups, i.e., fruits, and sugar sweetened beverage.

The results across the two cohorts were pooled using an inverse variance weighted, fixed-effect meta-analysis.

\* Red meat indicates all red meat in Model 1, processed meat in Model 2, and unprocessed meat in Model 3.

\*\*Whole grains included whole grain cold breakfast cereal, dark bread, oatmeal, brown rice, popcorn, bran, and germ;

\*\*\* vegetables included green leafy vegetables (such as spinach, kale and lettuces) and cruciferous vegetables (such as cabbage, cauliflower, brussels sprouts and broccoli) without legumes in the current substitution analysis.

**Supplementary Table 6.** HRs and 95% CIs for 4-year all-cause mortality associated with one serving/day decreased intake of red meat and concomitant increased intake of another major dietary protein source, whole grain, or vegetables during a 4-year course in the individual cohorts of NHS, HPFS and pooled findings

|                  | <b>Nuts</b>     | <b>Poultry (no skin)</b> | <b>Fish</b>     | <b>Dairy</b>    | <b>Eggs</b>     | <b>Legumes</b>  | <b>Whole grains*</b> | <b>Vegetables without legumes**</b> |
|------------------|-----------------|--------------------------|-----------------|-----------------|-----------------|-----------------|----------------------|-------------------------------------|
| <b>NHS</b>       |                 |                          |                 |                 |                 |                 |                      |                                     |
| Red Meat         | 0.84(0.79,0.88) | 0.77(0.72,0.82)          | 0.90(0.78,1.03) | 0.97(0.86,1.09) | 1.09(1.04,1.14) | 0.96(0.87,1.07) | 0.89(0.81,0.98)      | 0.90(0.86,0.95)                     |
| Processed Meat   | 0.76(0.69,0.85) | 0.71(0.64,0.78)          | 0.81(0.70,0.94) | 0.88(0.77,1.01) | 0.99(0.91,1.07) | 0.88(0.77,1.00) | 0.81(0.72,0.91)      | 0.82(0.76,0.90)                     |
| Unprocessed Meat | 0.84(0.79,0.90) | 0.77(0.72,0.83)          | 0.90(0.78,1.03) | 0.98(0.86,1.10) | 1.11(1.05,1.18) | 0.97(0.87,1.09) | 0.90(0.81,0.99)      | 0.91(0.86,0.97)                     |
| <b>HPFS</b>      |                 |                          |                 |                 |                 |                 |                      |                                     |
| Red Meat         | 0.84(0.80,0.87) | 0.96(0.90,1.01)          | 0.88(0.77,1.01) | 0.97(0.88,1.07) | 0.97(0.93,1.01) | 0.97(0.93,1.01) | 0.92(0.85,1.00)      | 0.94(0.90,0.98)                     |
| Processed Meat   | 0.81(0.75,0.87) | 0.93(0.86,1.00)          | 0.85(0.74,0.98) | 0.94(0.84,1.05) | 0.94(0.87,1.00) | 0.94(0.87,1.01) | 0.89(0.81,0.98)      | 0.91(0.85,0.97)                     |
| Unprocessed Meat | 0.84(0.79,0.89) | 0.95(0.90,1.02)          | 0.88(0.77,1.01) | 0.97(0.87,1.08) | 0.97(0.92,1.02) | 0.97(0.92,1.02) | 0.92(0.84,1.00)      | 0.94(0.89,0.99)                     |
| <b>Pooled</b>    |                 |                          |                 |                 |                 |                 |                      |                                     |
| Red Meat         | 0.84(0.81,0.87) | 0.87(0.84,0.91)          | 0.89(0.81,0.98) | 0.97(0.90,1.04) | 1.02(0.99,1.05) | 0.97(0.93,1.01) | 0.91(0.85,0.96)      | 0.92(0.89,0.95)                     |
| Processed Meat   | 0.79(0.75,0.84) | 0.83(0.78,0.89)          | 0.83(0.75,0.92) | 0.91(0.84,1.00) | 0.96(0.91,1.01) | 0.93(0.87,0.98) | 0.86(0.79,0.92)      | 0.87(0.83,0.92)                     |
| Unprocessed Meat | 0.84(0.81,0.88) | 0.87(0.83,0.91)          | 0.89(0.81,0.98) | 0.97(0.90,1.05) | 1.03(0.99,1.07) | 0.97(0.93,1.02) | 0.91(0.85,0.97)      | 0.93(0.89,0.96)                     |

CI: confidence interval; HPFS: Health Professionals Follow-up Study; HR: hazard ratio; NHS: Nurses' Health Study.

Model: Cox proportional hazards models including all food groups (red meat, nuts, poultry without skin, fish, dairy, eggs, legumes, whole grains, and vegetables excluding legumes) simultaneously (initial and change, both continuous, per serving), adjusted for age, race (white, nonwhite), BMI groups in 1986 (kg/m<sup>2</sup>, <21, 21-22, 23-24, 25-29, 30+), family history of MI, diabetes and cancer, updated aspirin use, multivitamin use; women menopausal status and use of postmenopausal hormones (premenopausal, postmenopausal and hormone therapy never user, postmenopausal and hormone therapy current user, postmenopausal and hormone therapy past user, or missing indicator) (only for women), and simultaneous changes in other lifestyle factors: smoking status (never to never, never to current, past to past, past to current, current to past, current to current or missing indicator) and initial and changes (all in quintiles) in physical activity, alcohol drink, total energy intake, and other food groups, i.e., fruits, and sugar sweetened beverage.

The results across the two cohorts were pooled using an inverse variance weighted, fixed-effect meta-analysis.

\*Whole grains included whole grain cold breakfast cereal, dark bread, oatmeal, brown rice, popcorn, bran, and germ;

\*\* vegetables included green leafy vegetables (such as spinach, kale and lettuces) and cruciferous vegetables (such as cabbage, cauliflower, brussels sprouts and broccoli) without legumes in the current substitution analysis.

**Supplementary Table 7.** HRs and 95% CIs for 12-year all-cause mortality associated with one serving/day decreased intake of red meat and concomitant increased intake of another major dietary protein source, whole grain, or vegetables during a 12-year course in the individual cohorts of NHS, HPFS and pooled findings

|                      | Nuts            | Poultry (no skin) | Fish            | Dairy           | Eggs            | Legumes         | Whole grains*   | Vegetables without legumes** |
|----------------------|-----------------|-------------------|-----------------|-----------------|-----------------|-----------------|-----------------|------------------------------|
| <b>NHS</b>           |                 |                   |                 |                 |                 |                 |                 |                              |
| Red Meat             | 0.83(0.79,0.88) | 0.72(0.63,0.82)   | 0.82(0.69,0.97) | 0.97(0.82,1.13) | 1.08(1.00,1.16) | 1.06(0.92,1.22) | 0.91(0.80,1.03) | 0.93(0.87,1.00)              |
| Processed Meat       | 0.79(0.72,0.87) | 0.69(0.57,0.84)   | 0.78(0.63,0.97) | 0.92(0.74,1.14) | 1.02(0.87,1.20) | 1.01(0.81,1.26) | 0.86(0.71,1.04) | 0.89(0.76,1.05)              |
| Unprocessed Meat     | 0.83(0.78,0.89) | 0.72(0.62,0.83)   | 0.82(0.68,0.97) | 0.97(0.82,1.14) | 1.09(1.00,1.19) | 1.06(0.91,1.23) | 0.90(0.79,1.04) | 0.93(0.86,1.02)              |
| <b>HPFS</b>          |                 |                   |                 |                 |                 |                 |                 |                              |
| Red Meat             | 0.86(0.81,0.90) | 0.88(0.81,0.95)   | 0.81(0.68,0.96) | 0.96(0.85,1.10) | 1.07(1.00,1.14) | 0.94(0.84,1.06) | 0.91(0.82,1.01) | 0.96(0.90,1.02)              |
| Processed Meat       | 0.82(0.76,0.88) | 0.85(0.76,0.95)   | 0.77(0.64,0.92) | 0.92(0.79,1.07) | 1.01(0.91,1.13) | 0.90(0.78,1.05) | 0.87(0.76,0.99) | 0.91(0.82,1.01)              |
| Unprocessed Meat     | 0.86(0.8,0.92)  | 0.88(0.80,0.97)   | 0.80(0.66,0.96) | 0.97(0.84,1.11) | 1.09(1.00,1.19) | 0.95(0.83,1.08) | 0.91(0.81,1.03) | 0.96(0.88,1.04)              |
| <b>Meta-analysis</b> |                 |                   |                 |                 |                 |                 |                 |                              |
| Red Meat             | 0.84(0.81,0.88) | 0.84(0.78,0.90)   | 0.81(0.72,0.92) | 0.96(0.87,1.07) | 1.07(1.02,1.13) | 0.99(0.90,1.08) | 0.91(0.84,0.98) | 0.95(0.90,0.99)              |
| Processed Meat       | 0.80(0.76,0.86) | 0.81(0.73,0.89)   | 0.77(0.67,0.89) | 0.92(0.81,1.04) | 1.02(0.93,1.11) | 0.94(0.83,1.06) | 0.87(0.78,0.96) | 0.90(0.83,0.99)              |
| Unprocessed Meat     | 0.80(0.80,0.88) | 0.82(0.76,0.89)   | 0.81(0.71,0.92) | 0.97(0.87,1.08) | 1.09(1.03,1.16) | 0.99(0.90,1.09) | 0.91(0.83,0.99) | 0.95(0.89,1.01)              |

CI: confidence interval; HPFS: Health Professionals Follow-up Study; HR: hazard ratio; NHS: Nurses' Health Study.

Model: Cox proportional hazards models including all food groups (red meat, nuts, poultry without skin, fish, dairy, eggs, legumes, whole grains, and vegetables excluding legumes) simultaneously (initial and change, both continuous, per serving), adjusted for age, race (white, nonwhite), BMI groups in 1986 (kg/m<sup>2</sup>, <21, 21-22, 23-24, 25-29, 30+), family history of MI, diabetes and cancer, updated aspirin use, multivitamin use; women menopausal status and use of postmenopausal hormones (premenopausal, postmenopausal and hormone therapy never user, postmenopausal and hormone therapy current user, postmenopausal and hormone therapy past user, or missing indicator) (only for women), and

simultaneous changes in other lifestyle factors: smoking status (never to never, never to current, pasta to past, past to current, current to past, current to current or missing indicator) and initial and changes (all in quintiles) in physical activity, alcohol drink, total energy intake, and other food groups, i.e., fruits, and sugar sweetened beverage.

The results across the two cohorts were pooled using an inverse variance weighted, fixed-effect meta-analysis.

\*Whole grains included whole grain cold breakfast cereal, dark bread, oatmeal, brown rice, popcorn, bran, and germ;

\*\* vegetables included green leafy vegetables (such as spinach, kale and lettuces) and cruciferous vegetables (such as cabbage, cauliflower, brussels sprouts and broccoli) without legumes in the current substitution analysis.
